# Supplementary material
Source: PubMed Central journal article supplement (PMC5679266)
Supplement: NIHMS901174-supplement-6.pdf [file NIHMS901174-supplement-6.pdf]

# Figure S1

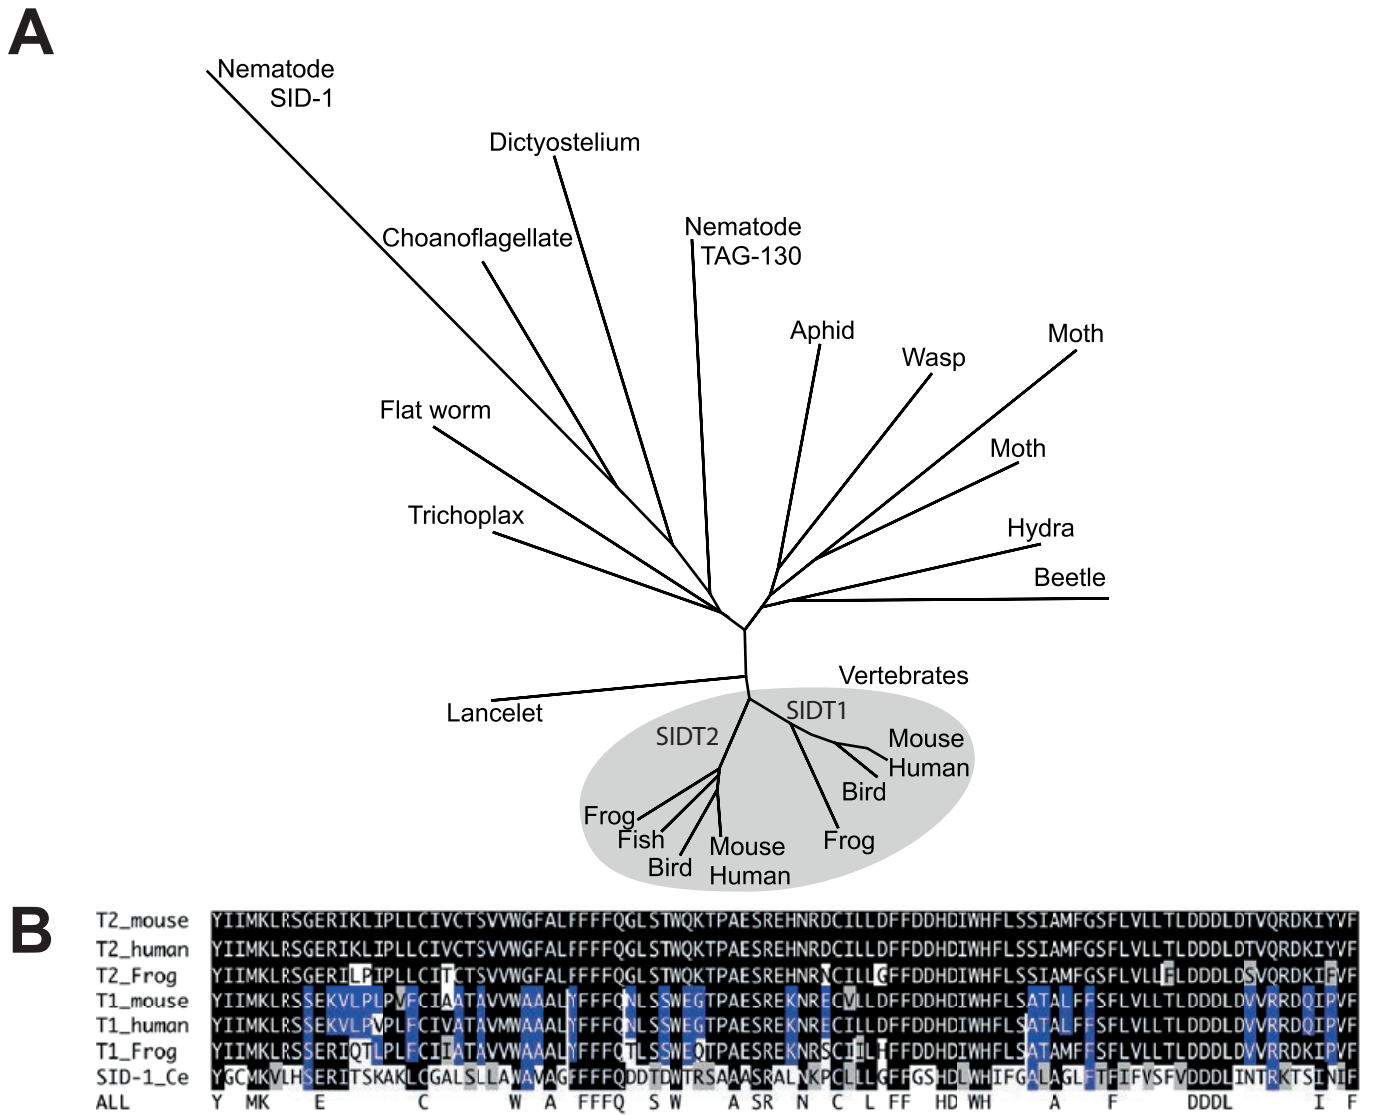

**Figure S1 – *C. elegans* SID-1 is conserved across diverse animal species, and its vertebrate orthologs, SIDT1 and SIDT2, are closely related.**

**(Related to "SID-1 family members: phylogenetic analysis" in STAR Methods)**

**(A)** Radial-tree display of aligned SID-1 homologous gene sequences by neighbour joining. SID-1 homologs are detected in nearly all sequenced animal phyla (including the primitive metazoan, Trichoplax, as well as choanoflagellates and Dictyostelium) but remain undetected in Diptera, Ascidiacea, plants, and prokaryotes. **(B)** Sequence identity (black background), similarity (grey) and SIDT1-specific differences (blue) of carboxy-terminal 100 amino acids (T1=SIDT1, T2=SIDT2, Ce=*C. elegans*). Identical amino acids in all seven sequences are shown at the bottom.

# Figure S2

## A

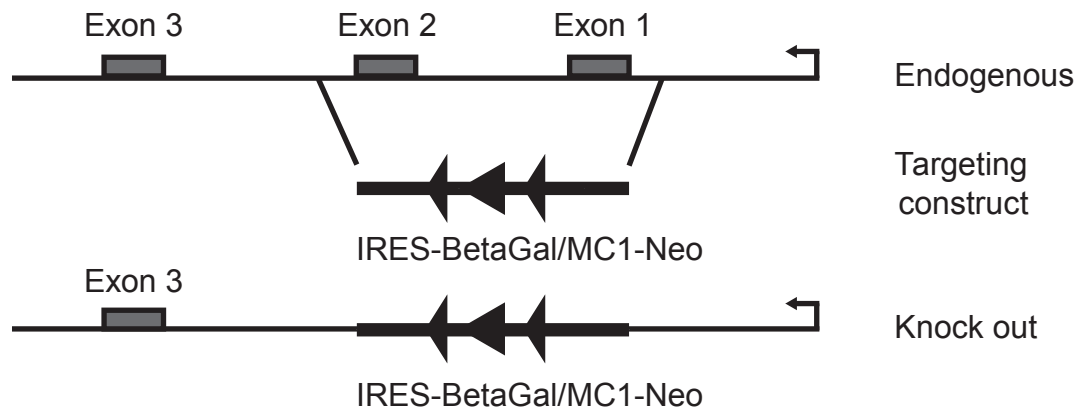

## B

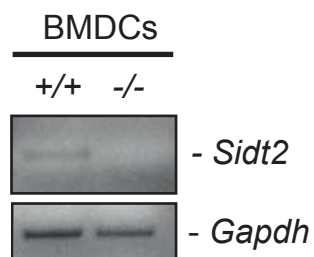

## C

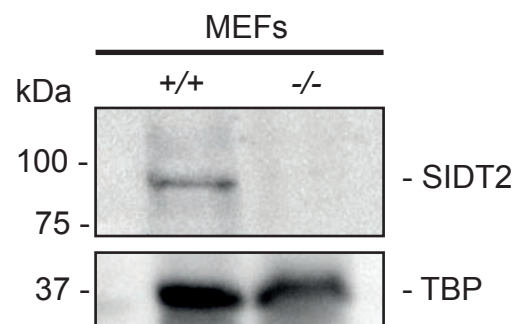

**Figure S2 – Targeting strategy and validation of *Sidt2*<sup>-/-</sup> mice.**

**(Related to Figures 2,3,4, 6 and 7)**

**(A)** Schematic of the endogenous *Sidt2* allele, *Sidt2* targeting construct, and mutated *Sidt2* allele following replacement of exons 1 and 2 with a LacZ-neomycin cassette. **(B)** RT-PCR analysis of *Sidt2* mRNA in *Sidt2*<sup>+/+</sup> and *Sidt2*<sup>-/-</sup> BMDCs following 30 amplification cycles. *Gapdh* mRNA served as a positive control. **(C)** Western blot analysis of SIDT2 protein in *Sidt2*<sup>+/+</sup> and *Sidt2*<sup>-/-</sup> MEFs following digitonin treatment and subsequent immunoprecipitation (IP) of SIDT2. TBP protein from the lysis buffer prior to IP served as an input control. Expected size of SIDT2: 95 kDa.

# Figure S3

## A

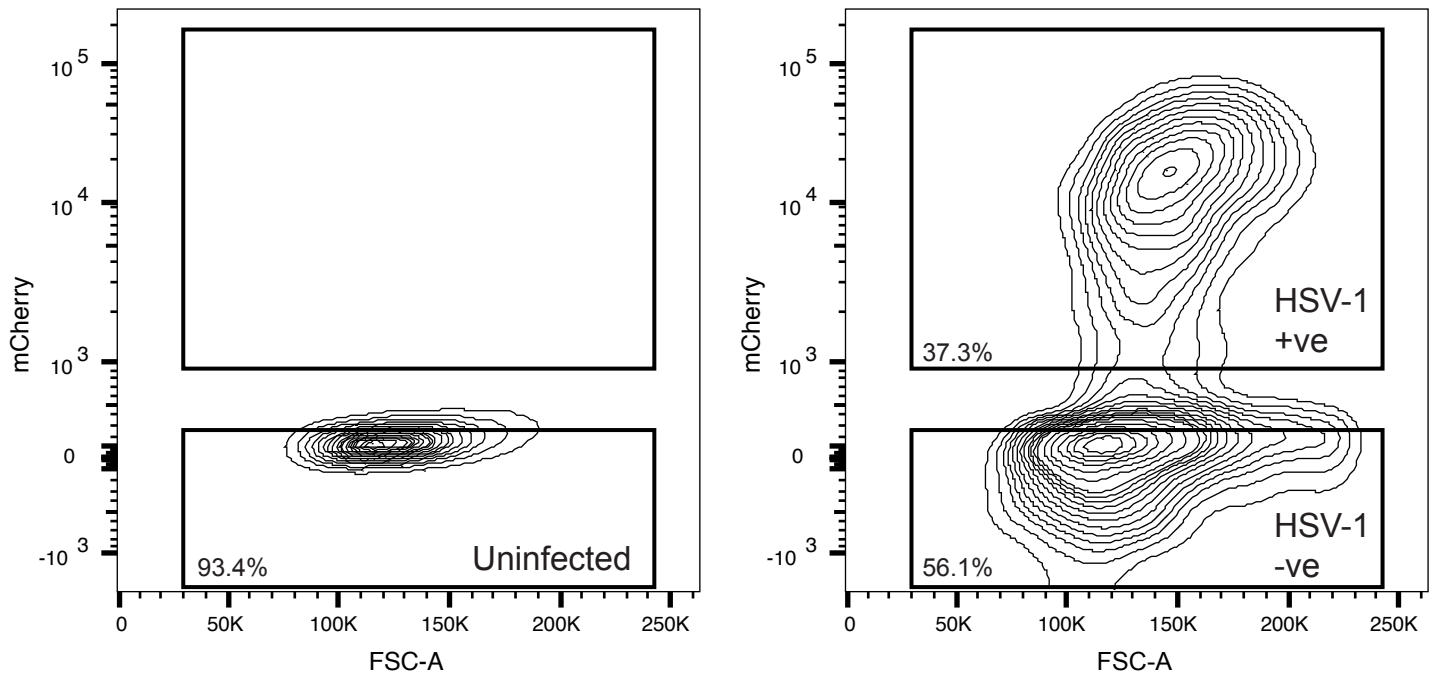

## B

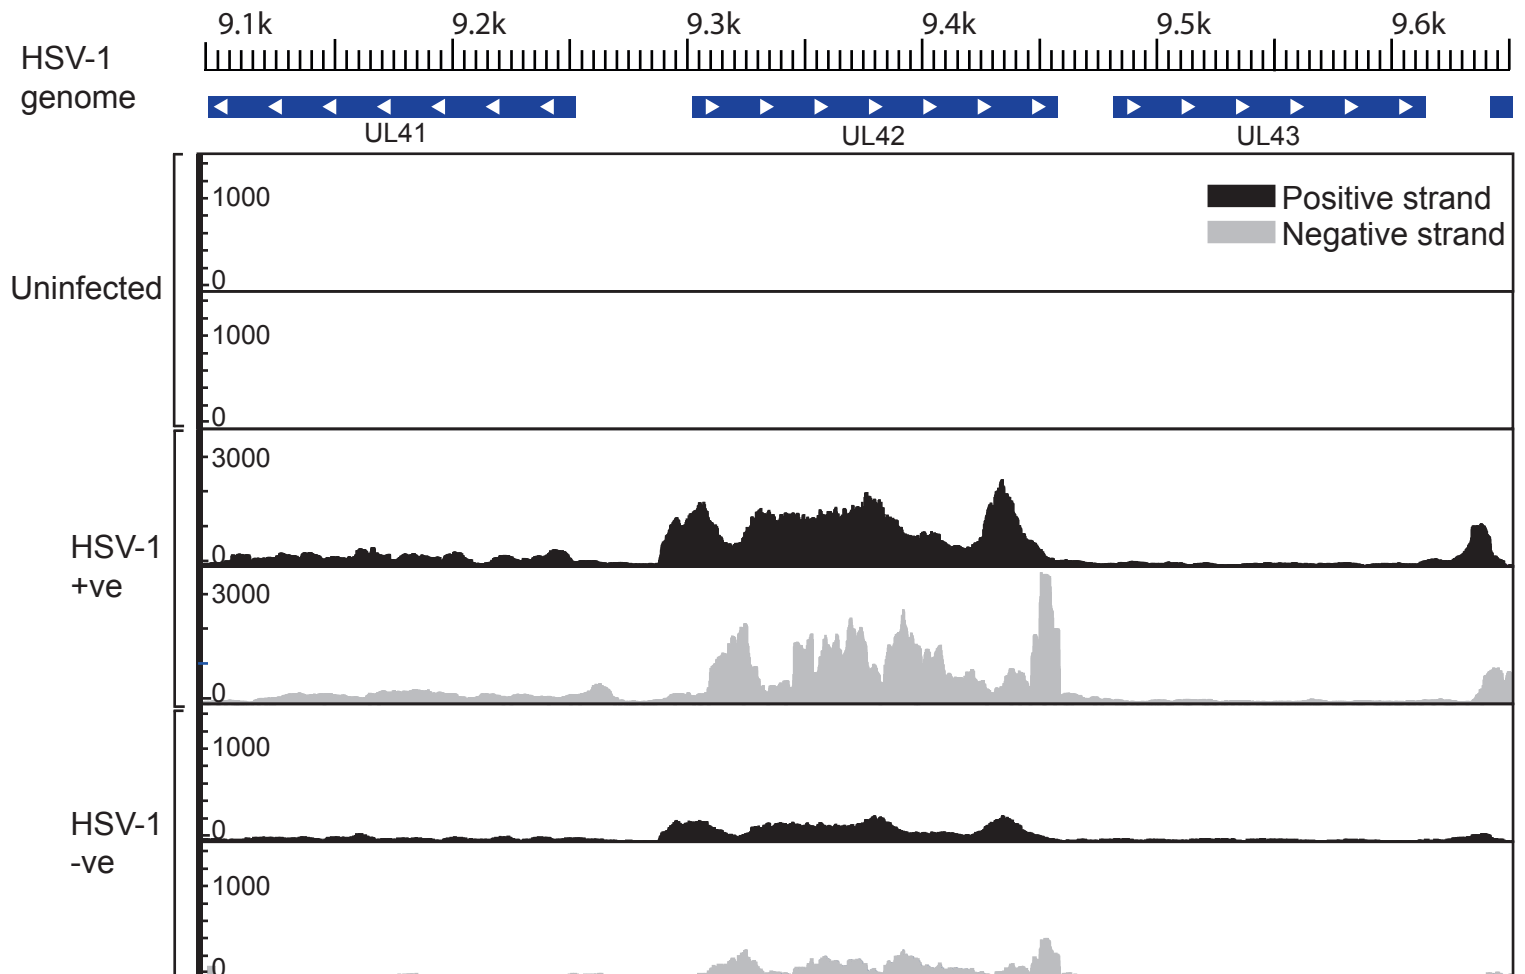

**Figure S3 – HSV-1 viral dsRNA is detectable in HSV-1<sup>-</sup> bystander cells.**

**(Related to Figure 2)**

(A) Vero cells were infected with 0.5 MOI HSV-1-GFP for 48 h (right panel) and HSV-1<sup>+</sup> and HSV-1<sup>-</sup> cells isolated by fluorescence-activated cell sorting (FACS). As a negative control, uninfected Vero cells were also isolated (left panel). (B) Representative RNAseq coverage plots from HSV-1<sup>+</sup>, HSV-1<sup>-</sup> and uninfected Vero cells of the HSV-1 genome are shown. To determine the presence of double-stranded RNAs, stranded RNAseq was performed in order to distinguish between reads from the positive strand and the negative strand.

# Figure S4

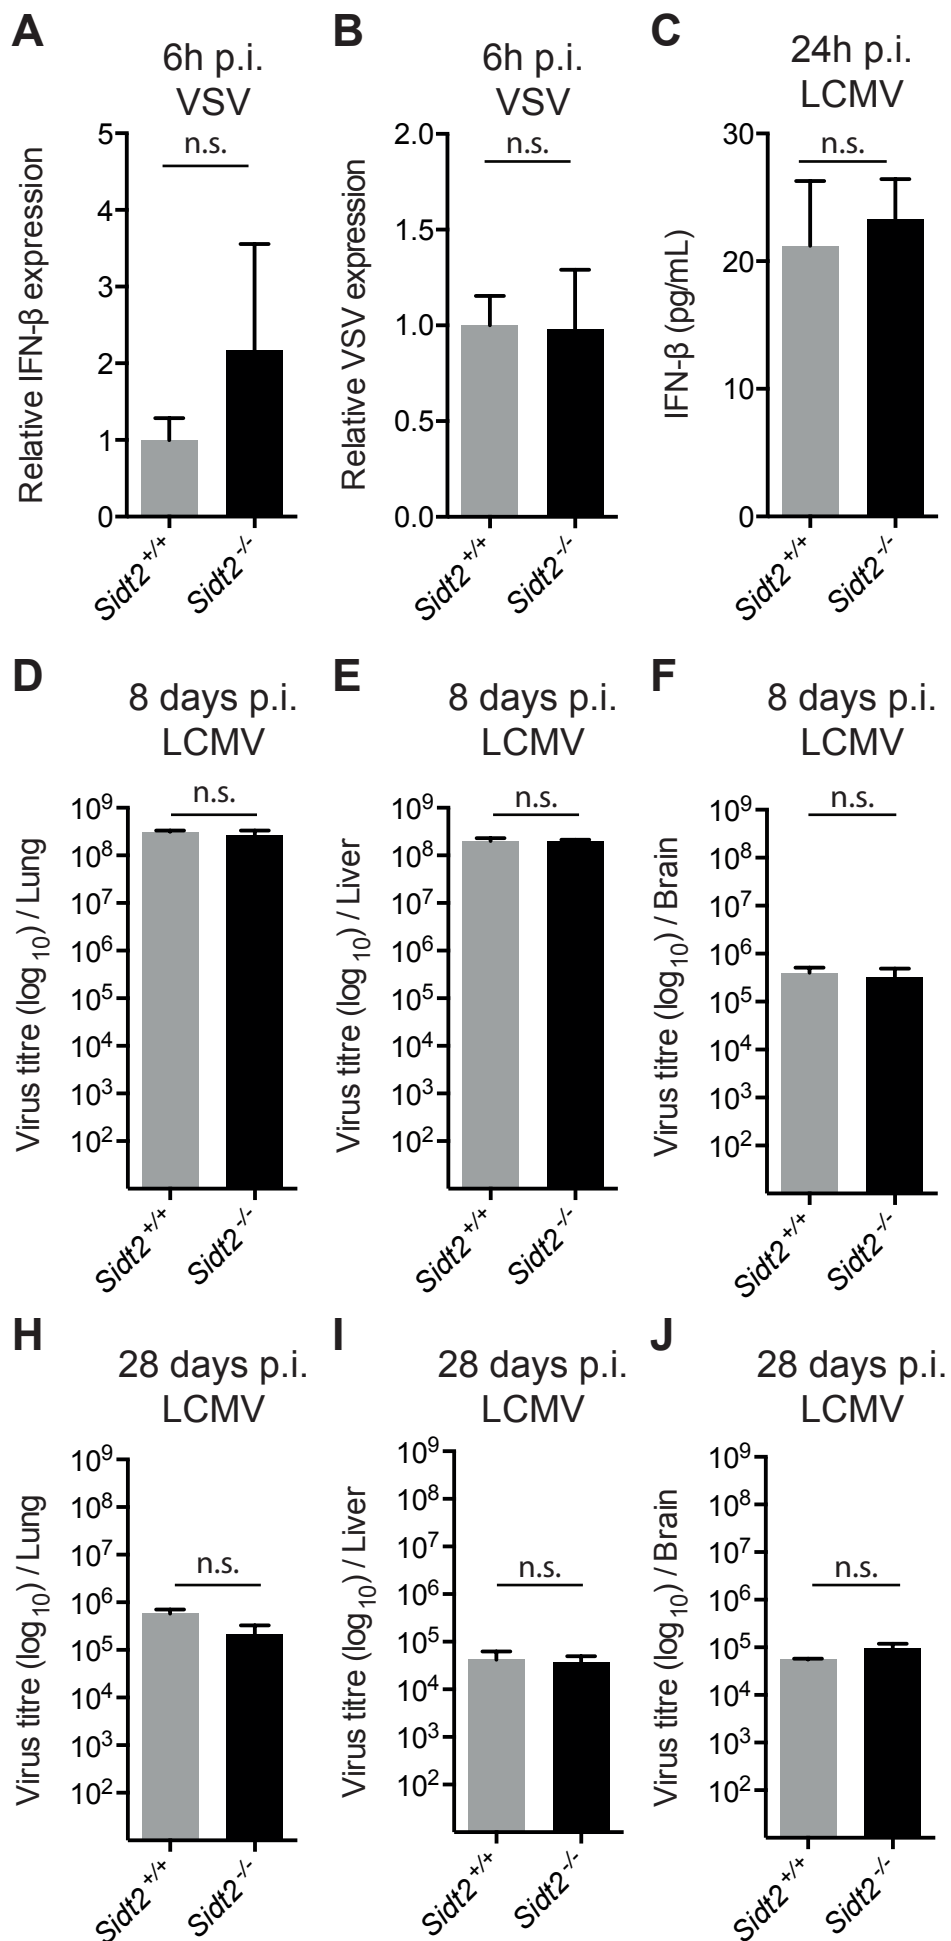

**Figure S4 – Loss of SIDT2 does not impair innate immunity to VSV and LCMV.**

**(Related to Figure 2 and 3)**

*Sidt2*<sup>+/+</sup> and *Sidt2*<sup>-/-</sup> mice (n=7-9) were infected with VSV via footpad injection, and **(A)** *Ifnβ* and **(B)** VSV mRNA within the draining popliteal lymph node were measured at 6 h p.i. by qRT-PCR and expressed relative to *Gapdh*. **(C)** *Sidt2*<sup>+/+</sup> and *Sidt2*<sup>-/-</sup> mice (n=5-7) were infected with LCMV (intravenous) and serum IFN-β measured by ELISA at 24h p.i. **(D-F)** Viral titres in lung, liver and brain of mice 8 days **(D-F)** and 28 days **(H-J)** p.i. were measured via viral plaque assay. Data are plotted as mean ± SEM. n.s. = not significant. Serum IFN-β was undetectable in uninfected mice.



# Figure S5

## A

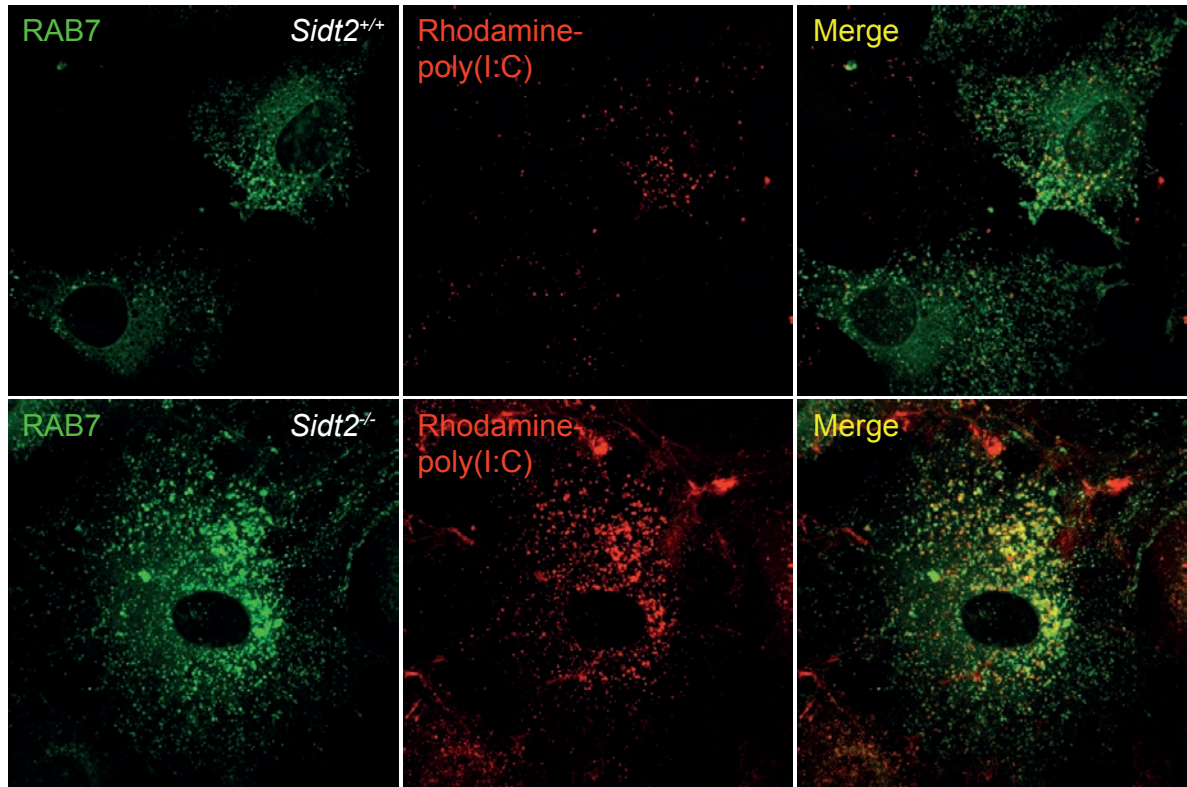

## B

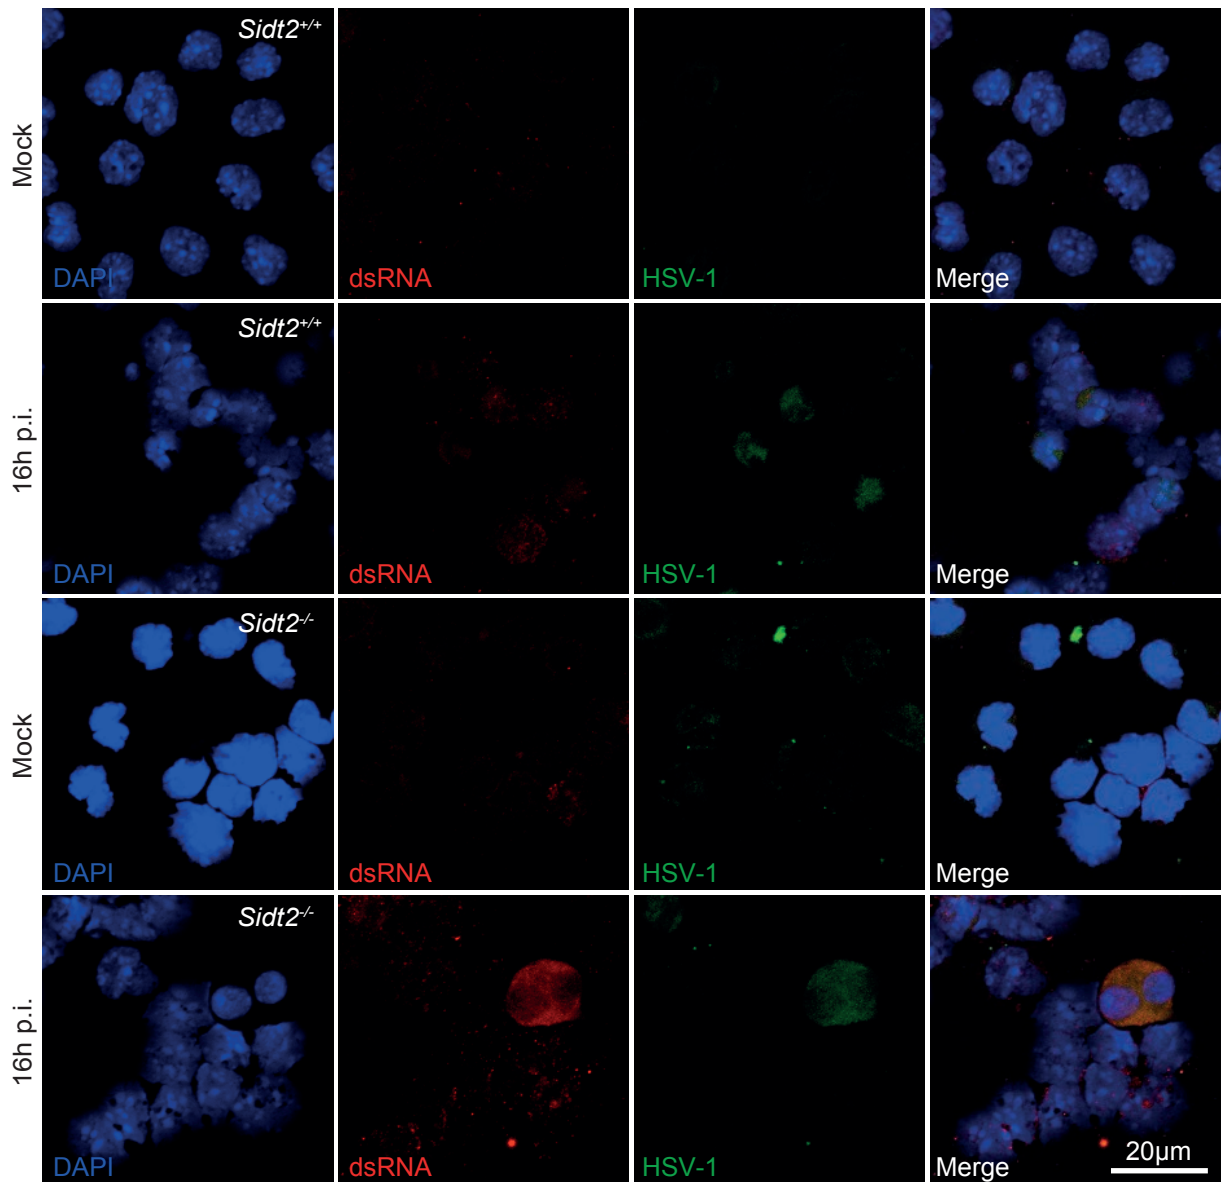

**Figure S5 – Loss of SIDT2 leads to accumulation of dsRNA.**

**(Related to Figures 4)**

**(A)** MEFs from *Sidt2*<sup>+/+</sup> and *Sidt2*<sup>-/-</sup> mice stably were treated with poly(I:C)-rhodamine for 60 min, stained with an anti-Rab7 antibody (green), and analysed via confocal microscopy. Data are representative of 3 independent experiments. **(B)** Cells were retrieved via peritoneal lavage from *Sidt2*<sup>+/+</sup> and *Sidt2*<sup>-/-</sup> mice (n=3) infected with 1x10<sup>7</sup> PFU HSV-1-GFP at 16 h p.i., stained with J2 dsRNA and DAPI antibody. Representative confocal images show localisation of HSV-1 dsRNA (red) in infected and uninfected cells.

# Figure S6

## A

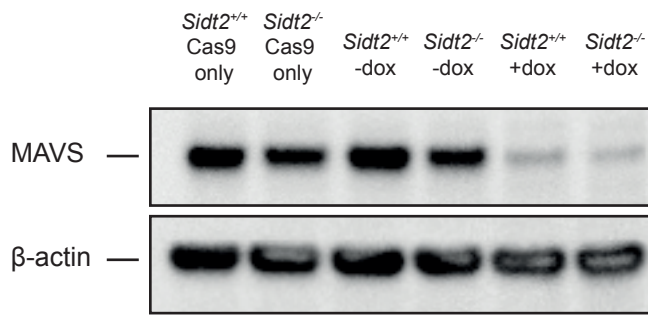

## B

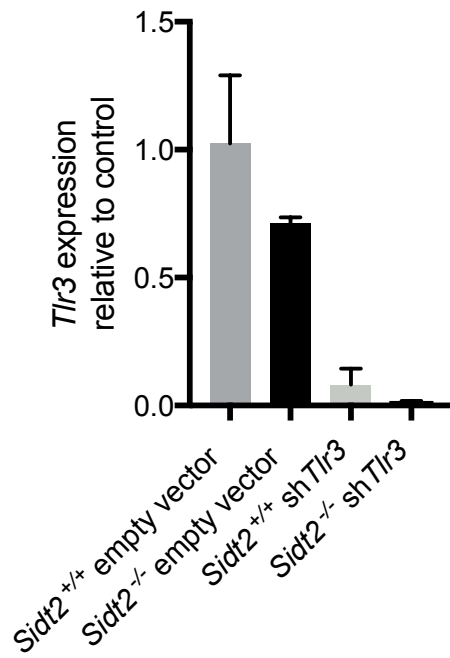

## C

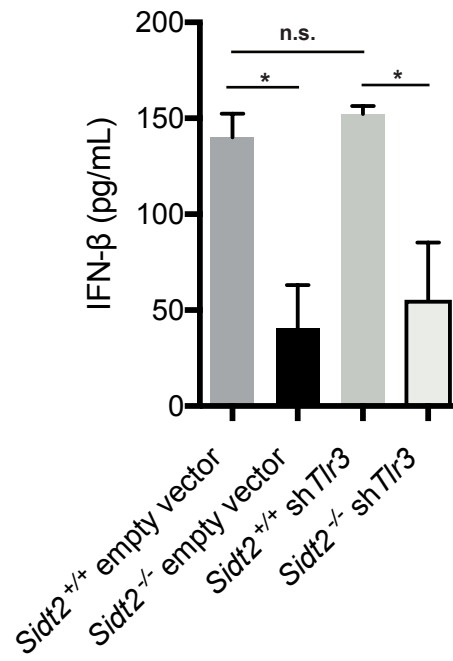

**Figure S6 – Generation and assessment of of *Sid2*<sup>-/-</sup> *Mavs*<sup>-/-</sup> and *Sid2*<sup>-/-</sup> *shTlr3* MEFs following HSV-1 infection.**

**(Related to Figure 7)**

(A) Protein lysates from *Sid2*<sup>+/+</sup> and *Sid2*<sup>-/-</sup> MEFs that had been targeted by CRISPR (doxycycline-inducible) for Mavs were immunoblotted with MAVS antibody and protein loading was confirmed by blotting for β-actin. (B) RNA was prepared from *Sid2*<sup>+/+</sup> and *Sid2*<sup>-/-</sup> MEFs transduced with *shTlr3* or empty vector control and *Tlr3* expression normalised to expression *Gapdh* was measured by qRT-PCR and expressed relative to empty vector control. Data is plotted as ± SD. (C) *shTLR3* and *Sid2*<sup>-/-</sup> *shTLR3* MEFs were infected with 1 MOI mCherry-tagged HSV-1 and IFN-β was measured in cell culture supernatant at 96 h p.i. via ELISA. *Sid2*<sup>+/+</sup> and *Sid2*<sup>-/-</sup> MEFs transduced with retroviral vector lacking shRNA (empty vector) were used as controls.

# Figure S7

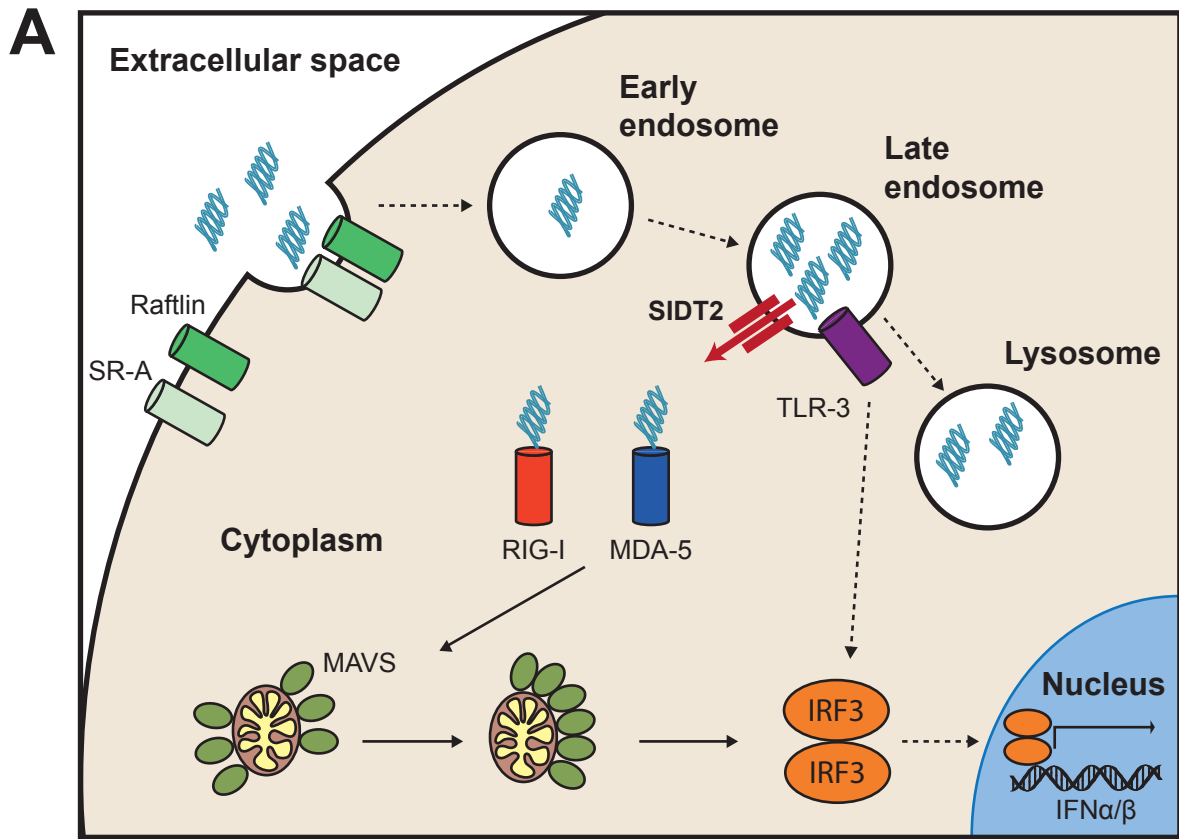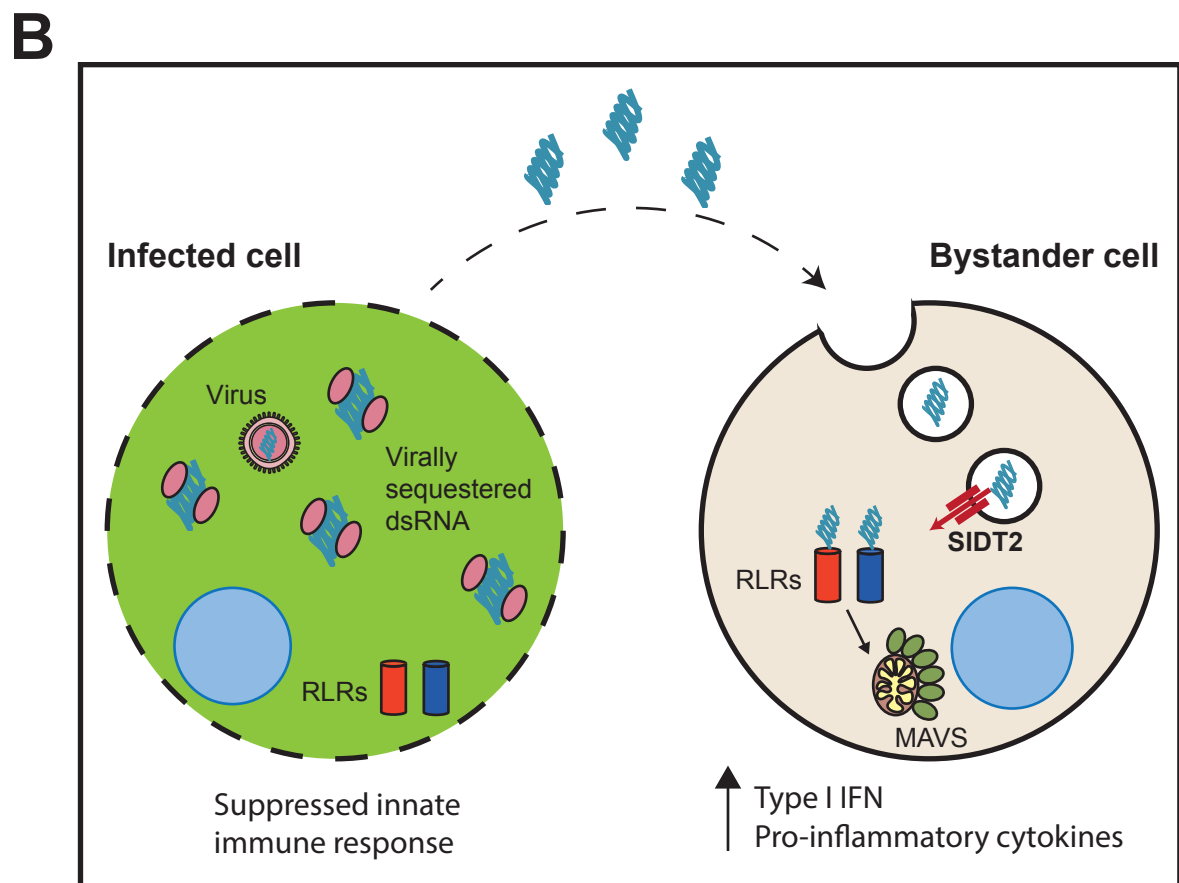

**Figure S7 – SIDT2 facilitates the endosomal escape of internalised dsRNA for cytosolic sensing by the RLRs and bystander activation of innate immunity.**

(A) Upon internalisation via receptor-mediated endocytosis, extracellular dsRNA enters the endocytic pathway. SIDT2 transports this internalised dsRNA across the endosomal membrane into the cytoplasm, where it can be detected by RIG-I and MDA-5 leading to activation of MAVS and type I IFN production. Although endosomal dsRNA can also be sensed by TLR3, the contribution of this signalling pathway to type I IFN production following extracellular dsRNA exposure *in vivo* (e.g. poly(I:C)) is minor (Gitlin et al., 2006). (B) Viruses rely on multiple strategies to inhibit the innate immune response in infected cells leading to immune suppression in these cells. The transfer of dsRNA from infected cells to uninfected cells leads to SIDT2-dependent bystander activation of innate immunity via MAVS. The mechanisms by which dsRNA is transferred extracellularly remain to be determined, but might include cell lysis (e.g. due to the virus itself or immune destruction) and/or active release (e.g. via extracellular vesicles).

Table S1

| <b>Accession</b> | <b>Description</b>                                      |
|------------------|---------------------------------------------------------|
| NP_001035545.1   | SIDT2 [ <i>Homo sapiens</i> ] human                     |
| NP_060169.2      | SIDT1 [ <i>Homo sapiens</i> ] human                     |
| NP_758461.1      | SIDT2 [ <i>Mus musculus</i> ] mouse                     |
| EDK98036.1       | SIDT1 [ <i>Mus musculus</i> ] mouse                     |
| *                | SIDT2 [ <i>Xenopus tropicalis</i> ] frog                |
| *                | SIDT1 [ <i>Xenopus tropicalis</i> ] frog                |
| XP_001233566.1   | SIDT2 [ <i>Gallus gallus</i> ] bird                     |
| XP_416544.2      | SIDT1 [ <i>Gallus gallus</i> ] bird                     |
| AAI55670.1       | SIDT2 [ <i>Danio rerio</i> ] fish                       |
| XP_001520303.1   | SIDT1 [ <i>Ornithorhynchus anatinus</i> ] platypus      |
| XP_001502624.1   | SIDT2 [ <i>Equus caballus</i> ] horse                   |
| ACH970561.1      | SID2 [ <i>Otolemur garnetti</i> ] bush baby             |
| XP_002597180.1   | SIDT-1/2 [ <i>Branchiostoma floridae</i> ] lancelet     |
| NP_504372.2      | SID-1 [ <i>Caenorhabditis elegans</i> ] nematode        |
| XP_002636380.1   | SID-1 [ <i>Caenorhabditis briggsae</i> ] nematode       |
| XP_002645379.1   | TAG-130 [ <i>Caenorhabditis briggsae</i> ] nematode     |
| NP_509489.1      | TAG-130 [ <i>Caenorhabditis elegans</i> ] nematode      |
| XP_001605484.1   | SID-1 [ <i>Natsonia vitripennis</i> ] wasp              |
| NP_001099012.1   | SID-1-related A [ <i>Tribolium castaneum</i> ] beetle   |
| BAF95807.1       | SID-1-like protein2 [ <i>Bombyx mori</i> ] moth         |
| NP_001106736.1   | SID-1 related gene3 [ <i>Bombyx mori</i> ] moth         |
| XP_001951907.1   | SID-1 [ <i>Acyrtosiphon pisum</i> ] aphid               |
| ABP98803.1       | SID-1 [ <i>Aphis gossypii</i> ] aphid                   |
| XP_002576874.1   | SID-1 [ <i>Schistosoma mansoni</i> ] flatworm           |
| XP_002114117.1   | SID-1 [ <i>Trichoplax adhaerens</i> ] Placozoa          |
| XP_002168603.1   | SID-1 [ <i>Hydra magnipapillata</i> ] Cnidaria          |
| XP_001742158.1   | SID-1 [ <i>Monosiga brevicollis</i> ] Choanoflagellate  |
| XP_001733041.1   | SID-1 [ <i>Dictyostelium discoideum</i> AX4] slime mold |

## SUPPLEMENTAL TABLES

### Supplemental Table 1. Accession number and description of proteins used in Supplemental Figure 1.

\* *Xenopus tropicalis* *SidT1* and *SidT2* cDNA clones (IMAGE ID 7655239 and Sanger EST Clone ID TGas116o12) were obtained from Geneservice ([www.geneservice.co.uk](http://www.geneservice.co.uk)), and confirmed as full-length cDNAs by sequencing and comparison to EST clusters assembled in the Gordon Institute Full-Length database (Gilchrist et al., 2004). The corresponding protein sequences are listed below:

#### *X. tropicalis* *SIDT1*

MMAGMRPIWG NWILIFWLGT CAEALTRATG SKPAEFGKRY TGFVDKNTEE LYSFSYTSKN  
DTVDALRVFV SSSINLEFP VLFVVRQKKA ILSWQVPMVF RGNFPRTYTY QDVSRTLCP  
EPEEGTGSQE QFIYIDIASM SPSIVQYELM VTRLLSFQK TSVPFNFSAS PSQPQYFLYT  
FPEGVDSVII KVKSPENYPC SVSVQDISC PVYDLVDYNE FNGVYQTMK QAAITVQRKE  
YPGGKFYVVF VIKPEDYTCG GTVPQSTQGS GNHTWNLKRV KHMEVTVSPS VKDSVYVQAT  
LLCLLYFLIF YVGSLLVAFV HYVSIHRKER NLKGSPEDEGE GTVAASHPIT TSTPDGSSYG  
AIDEPPGAR KMTPPPPIRP RVYSDSSADE ESDFDAIPEM ETDKNVIRAK TFLYVSDLA  
KDRRVVSKKY RIYFVNIITI AVFYALPVVQ LVITYQTVLN VTGNQDICYY NFLCAHPLGV  
LSAFNNVMSN MGHVLLGFLF LLIVLRDRL HRHLLLEVNDT YAKDYGIPKH FGLFYTMGVA  
LIMEGVLSAC YHVCNYSNF QFDTSFMYMI AGLCMLKLYQ TRHPDINASA YAAAYASFALV  
IFLAVMGVIF GKDNVWFVVI FSIHVHVGSL ALSTHIYYMG RFRIDVSNAD FGIFKRIAQV  
LYTDCMQQCS RPMYMDRMIL LIVGNVNWL FAIFGLVFRP RDFPSYLLGI FICNLLLYLA  
FYIIMKLRSS ERIQTLPLFC IIATAVWAA ALYFFFQTL SWEQTPAESR EKNRSCILH  
FFDDHDIWHF LSATAMFFSF LVLLTLDDDL DVVRRDKIPV F

#### *X. tropicalis* *SIDT2*

MPVFGVLLLI WHIGLSLGGN TYFQDKVIVQ KNAEFNKEYN DSVNAEQQNI YAFNHTMLRN  
KTDGVRVSVN VLSQKATPL LFFVVRQKEAV VSFQVPLALR GQYQRNYLYQ DVGRTLCP  
TRAEATESF YVDVSTLAEK NTTYRLRVTH VENFVLQTNQ PFNFNATPAQ PQYFKYLFPE  
GVESVIVKVS SSSVFPCSVI SVQDIQCPVY DLDNNVAFIG MYQTMKKAA ITVQRKDFSS  
GGFYVVVVVK TEDEACGGAL PLFPLHQDIP VDHLRQKNL EVLVSPAINR NVYVAGMLFC  
LGVFLSFYLV ALLISCWEQY RKKNKSEDPF LNSASSLNDE TASLLGKPPM CPKYDACGYG  
SIAAQHSSSV PSPEDCTDSL VSSGEATYSY TDRSLENLVS RNRLESLSV EEDDYDTLTD  
IESDKNVIRT KKFLCVSDLA RKDKRVMRKK YQIYFVNIST IAVFYALPVI QLVITYQTVV  
NVTGNQDICY YNFLCAHPLG SLFAFNILS NLGYVMLGLL FLVIVLQREL SHNHNRMNIR  
GQLQECGIPK HFGLFYAMGT ALMMEGLLSA CYHVCNPNYTN FQFDTSFMYM IAGLCMLKLY  
QKRHPDINAS AYSAYACLAI VIFFSVVGVV FGNGTIFWV VFSVIHILFT LLLSTQLYYM  
GRWRLDSAIL RRIFHVLYTD CVRQCSPMY VDRMVLLVMG NIVNWSLAAY GLIVRPKDF  
SYLLAIGICN LLLYFAFYII MKLRSGERIL PIPLLCITCT SVVWGFALFF FFQGLSTWQK  
TPAESREHNR NCILLGFFDD HDIWHFLSSI AMFGSFLVLL FLDDDLDSVQ RDKIFVF

GVESVIVKVS SSSVFPCSVI SVQDIQCPVY DLDNNVAFIG MYQTMKKAA ITVQRKDFSS  
GGFYVVVVVK TEDEACGGAL PLFPLHQDIP VDHLRQKNL EVLVSPAINR NVYVAGMLFC  
LGVFLSFYLV ALLISCWEQY RKKNKSEDPF LNSASSLNDE TASLLGKPPM CPKYDACGYG  
SIAAQHSSSV PSPEDCTDSL VSSGEATYSY TDRSLENLVS RNRLESLSV EEDDYDTLTD  
IESDKNVIRT KKFLCVSDLA RKDKRVMRKK YQIYFVNIST IAVFYALPVI QLVITYQTVV  
NVTGNQDICY YNFLCAHPLG SLFAFNILS NLGYVMLGLL FLVIVLQREL SHNHNRMNIR  
GQLQECGIPK HFGLFYAMGT ALMMEGLLSA CYHVCNPNYTN FQFDTSFMYM IAGLCMLKLY  
QKRHPDINAS AYSAYACLAI VIFFSVVGVV FGNGTIFWV VFSVIHILFT LLLSTQLYYM  
GRWRLDSAIL RRIFHVLYTD CVRQCSPMY VDRMVLLVMG NIVNWSLAAY GLIVRPKDF  
SYLLAIGICN LLLYFAFYII MKLRSGERIL PIPLLCITCT SVVWGFALFF FFQGLSTWQK  
TPAESREHNR NCILLGFFDD HDIWHFLSSI AMFGSFLVLL FLDDDLDSVQ RDKIFVF
